# Supplementary material
Source: PubMed Central journal article supplement (PMC4180710)
Supplement: NIHMS623203-supplement-01.pdf [file NIHMS623203-supplement-01.pdf]

**eTable 1.** Adjusted <sup>a</sup> semen parameters according to processed meat intake by modeling abstinence time in different ways

| <b>Processed red meat intake (servings/day);<br/>range</b>                                              | <b>Total sperm count<br/>(million)</b> | <b>Ejaculate volume<br/>(mL)</b> |
|---------------------------------------------------------------------------------------------------------|----------------------------------------|----------------------------------|
|                                                                                                         | <b>Mean (95% CI)</b>                   | <b>Mean (95% CI)</b>             |
| Modeling abstinence time as dummy variables<br>(original model)                                         |                                        |                                  |
| Q1 (0 - 0.42)                                                                                           | 167 (117 to 239)                       | 3.9 (3.4 to 4.4)                 |
| Q2 (0.44 - 0.85)                                                                                        | 163 (120 to 221)                       | 3.8 (3.4 to 4.3)                 |
| Q3 (0.87 - 1.44)                                                                                        | 146 (112 to 191)                       | 3.3 (2.9 to 3.7)                 |
| Q4 (1.45 - 5.26)                                                                                        | 94 (68 to 129)                         | 2.8 (2.4 to 3.2)*                |
| Test for trend                                                                                          | <i>P</i> = 0.01                        | <i>P</i> = 0.003                 |
| Modeling abstinence time as dummy variables<br>with finer categories <2 to 2-3 to 3-5 to and >5<br>days |                                        |                                  |
| Q1 (0 - 0.42)                                                                                           | 160 (110 to 233)                       | 3.8 (3.3 to 4.3)                 |
| Q2 (0.44 - 0.85)                                                                                        | 164 (121 to 221)                       | 3.8 (3.4 to 4.3)                 |
| Q3 (0.87 - 1.44)                                                                                        | 148 (114 to 192)                       | 3.3 (2.9 to 3.7)                 |
| Q4 (1.45 - 5.26)                                                                                        | 97 (71 to 133)                         | 2.8 (2.4 to 3.3)                 |
| Test for trend                                                                                          | <i>P</i> = 0.02                        | <i>P</i> = 0.0005                |
| Modeling abstinence time as continuous                                                                  |                                        |                                  |
| Q1 (0 - 0.42)                                                                                           | 157 (110 to 223)                       | 3.8 (3.3 to 4.3)                 |
| Q2 (0.44 - 0.85)                                                                                        | 166 (123 to 223)                       | 3.8 (3.4 to 4.3)                 |
| Q3 (0.87 - 1.44)                                                                                        | 148 (114 to 192)                       | 3.3 (2.9 to 3.7)                 |
| Q4 (1.45 - 5.26)                                                                                        | 98 (70 to 135)                         | 2.9 (2.5 to 3.3)                 |
| Test for trend                                                                                          | <i>P</i> = 0.03                        | <i>P</i> = 0.0008                |
| Including a linear and a quadratic term                                                                 |                                        |                                  |
| Q1 (0 - 0.42)                                                                                           | 157 (110 to 224)                       | 3.8 (3.3 to 4.3)                 |
| Q2 (0.44 - 0.85)                                                                                        | 163 (121 to 219)                       | 3.8 (3.4 to 4.3)                 |
| Q3 (0.87 - 1.44)                                                                                        | 149 (114 to 193)                       | 3.3 (2.9 to 3.7)                 |
| Q4 (1.45 - 5.26)                                                                                        | 99 (72 to 136)                         | 2.9 (2.4 to 3.3)                 |

|                                   |                  |                  |
|-----------------------------------|------------------|------------------|
| Test for trend                    | $P = 0.03$       | $P = 0.0006$     |
| Not adjusting for abstinence time |                  |                  |
| Q1 (0 - 0.42)                     | 184 (130 to 261) | 4.0 (3.5 to 4.5) |
| Q2 (0.44 - 0.85)                  | 166 (121 to 228) | 3.8 (3.4 to 4.3) |
| Q3 (0.87 - 1.44)                  | 140 (107 to 185) | 3.2 (2.9 to 3.6) |
| Q4 (1.45 - 5.26)                  | 88 (63 to 123)   | 2.8 (2.3 to 3.2) |
| Test for trend                    | $P = 0.003$      | $P < 0.0001$     |

---

<sup>a</sup> Adjusted for age to abstinence time to race to smoking status to BMI to recruitment period to moderate-to-intense exercise to TV watching to dietary patterns to and total calorie intake

**eTable 2.** Adjusted <sup>a</sup> semen parameters (mean (95% confidence interval)) according to processed meat intake by modeling abstinence time in difference ways

| <b>Processed red meat intake (servings/day); range</b> | <b>Total sperm count (million)</b> |                          |                          | <b>Ejaculate volume (mL)</b> |                          |                          |
|--------------------------------------------------------|------------------------------------|--------------------------|--------------------------|------------------------------|--------------------------|--------------------------|
|                                                        | abstinence time <2days             | abstinence time 2-5 days | abstinence time ≥ 5 days | abstinence time <2days       | abstinence time 2-5 days | abstinence time ≥ 5 days |
|                                                        | Mean (95% CI)                      | Mean (95% CI)            | Mean (95% CI)            | Mean (95% CI)                | Mean (95% CI)            | Mean (95% CI)            |
| Q1 (0 - 0.42)                                          | 111 (76 to 161)                    | 141 (90 to 223)          | 219 (79 to 603)          | 3.5 (2.6 to 4.5)             | 3.7 (3.1 to 4.3)         | 4.9 (3.1 to 6.7)         |
| Q2 (0.44 - 0.85)                                       | 236 (124 to 450)                   | 156 (111 to 219)         | 293 (134 to 638)         | 4.0 (2.8 to 5.3)             | 3.6 (3.1 to 4.0)         | 4.5 (3.3 to 5.7)         |
| Q3 (0.87 - 1.44)                                       | 65 (41 to 103)                     | 140 (103 to 189)         | 136 (46 to 405)          | 3.7 (2.6 to 4.7)             | 3.1 (2.6 to 3.5)         | 4.1 (2.5 to 5.8)         |
| Q4 (1.45 - 5.26)                                       | 48 (34 to 67)                      | 121 (85 to 173)          | 187 (39 to 892)          | 2.4 (1.6 to 3.2)             | 2.9 (2.5 to 3.4)         | 2.7 (0.1 to 5.3)         |
| Test for trend                                         | <i>P</i> = 0.006                   | <i>P</i> = 0.43          | <i>P</i> = 0.32          | <i>P</i> = 0.01              | <i>P</i> = 0.03          | <i>P</i> = 0.07          |
| Test for heterogeneity                                 |                                    | <i>P</i> = 0.051         |                          |                              | <i>P</i> = 0.01          |                          |

<sup>a</sup> Adjusted for age to abstinence time (as linear term in each stratum) to race to smoking status to BMI to recruitment period to moderate-to-intense exercise to TV watching to dietary patterns to and total calorie intake
